# Supplementary material for: A susceptibility gene signature for ERBB2-driven mammary tumour development and metastasis in collaborative cross mice
Source: PubMed Central journal article supplement (PMC11338061; doi:10.1016/j.ebiom.2024.105260), 2024-07-26
Supplement: mmc1.pdf [file mmc1.pdf]

## Supplementary Figures and Tables

### A susceptibility gene signature for ERBB2-driven mammary tumor development and metastasis in Collaborative Cross mice with human translational value

Hui Yang<sup>1,2</sup>, Xinzhi Wang<sup>1,3</sup>, Adrián Blanco-Gómez<sup>4,5</sup>, Li He<sup>1,6</sup>, Natalia García-Sancha<sup>4,5</sup>, Roberto Corchado-Cobos<sup>4,5</sup>, Manuel Jesús Pérez-Baena<sup>4,5</sup>, Alejandro Jiménez-Navas<sup>4,5</sup>, Pin Wang<sup>1,7</sup>, Jamie L Inman<sup>1</sup>, Antoine M Snijders<sup>1,8</sup>, David W Threadgill<sup>9,10</sup>, Allan Balmain<sup>11</sup>, Hang Chang<sup>1,8\*</sup>, Jesus Perez-Losada<sup>4,5\*</sup>, Jian-Hua Mao<sup>1,8\*</sup>

## Supplementary Figures

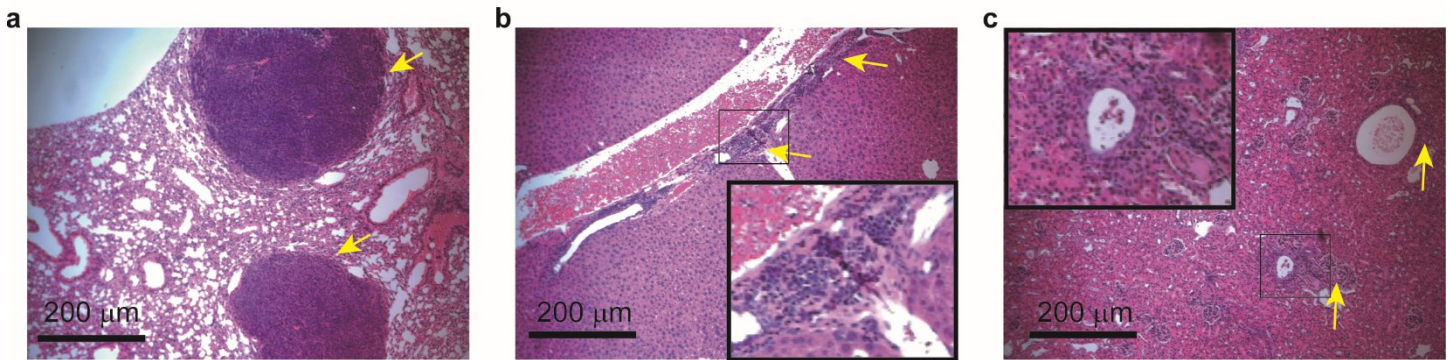

**Supplementary Figure S1. Representative histological image for metastasis.** (a) Metastasis in lung. (b) metastasis in the liver. (c) Metastasis in the kidney. The yellow arrows point to metastatic foci.

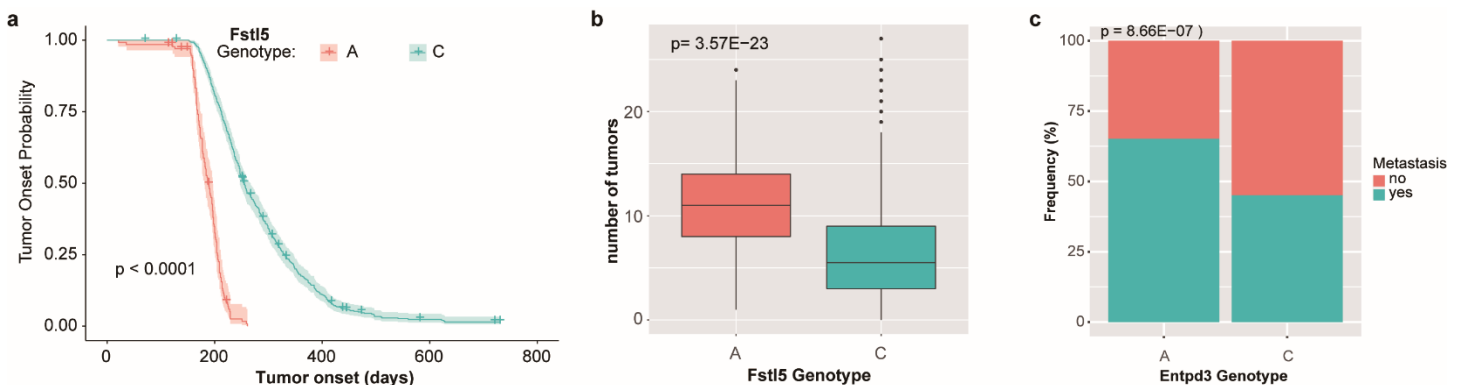

**Supplementary Figure S2. Association of representative SNPs with *ErbB2*-driven tumor phenotype.** (a) Significant association of SNP in *Fstl5* gene with tumor onset. The p value was obtained from the Kaplan-Meier method and the log-rank test. (b) Significant association of SNP *Fstl5* gene with tumor multiplicities. The p value was obtained from the Mann-Whitney U test. (c) Significant association of SNP in *Entpd3* gene with overall tumor metastasis. The p value was obtained from the Chi-square test.

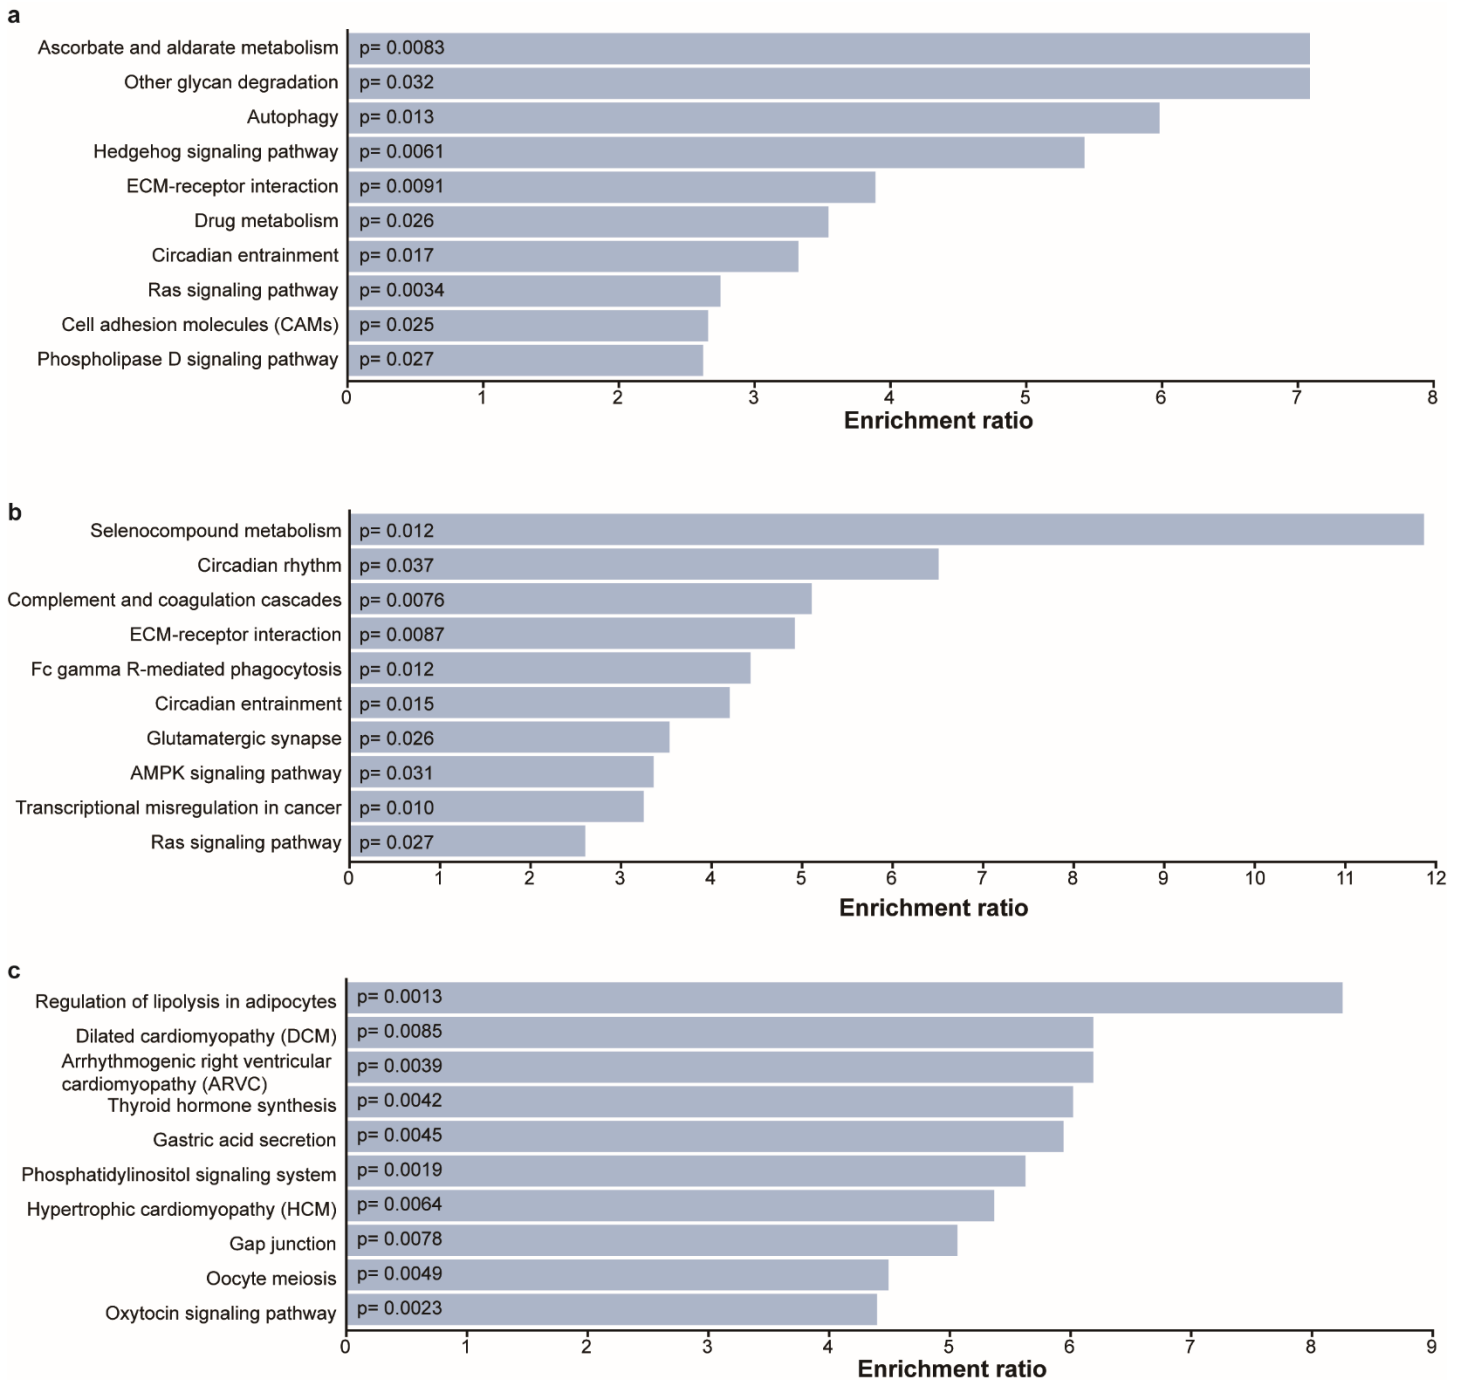

**Supplementary Figure S3. KEGG pathway enrichment analysis of candidate genes for ErbB2-driven tumor phenotypes. (a) Tumor onset. (b) Tumor multiplicities. (c) Overall metastasis. The p values are obtained from hypergeometric test.**

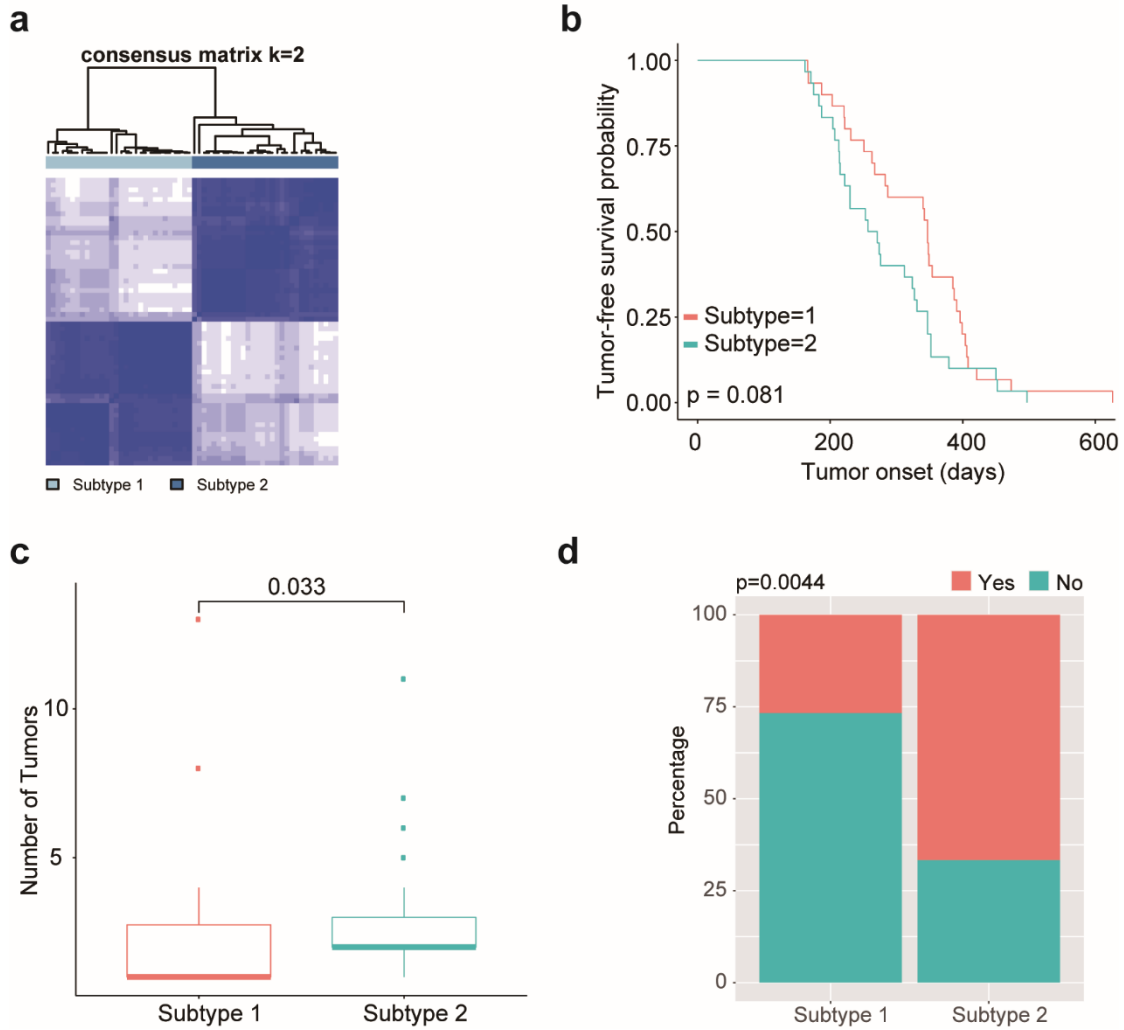

**Supplementary Figure S4. Subtyping mouse mammary tumors based on transcriptional level of 20 mTSGS genes.** (a) Consensus clustering model for mouse mammary tumor subtypes discovery and inference. (b-d) Subtypes show significant differences in tumor onset (b), multiplicity (c), and metastasis (d). The p values were obtained from log-rank test (b), Mann-Whitney U test (c) and Chi-square test (d).

## Gene set from tumor onset

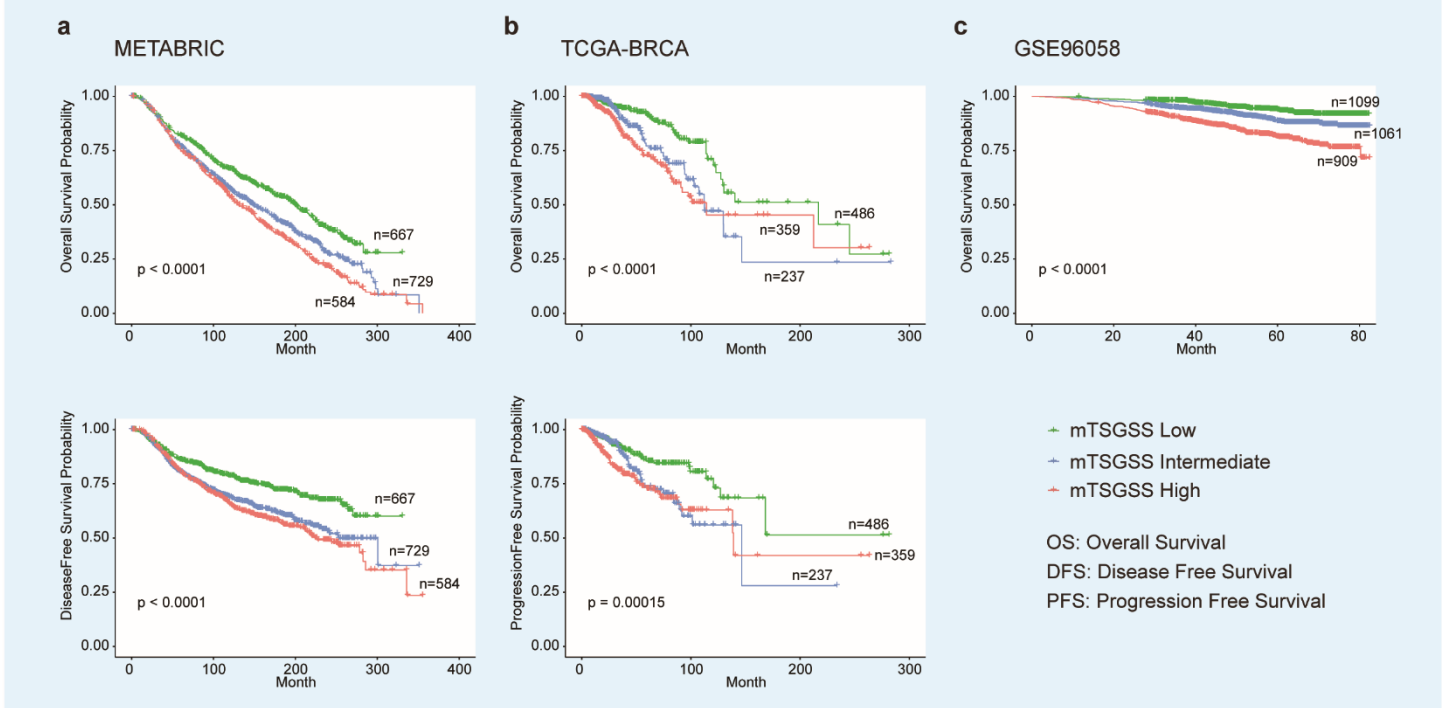

## Gene set from tumor multiplicity

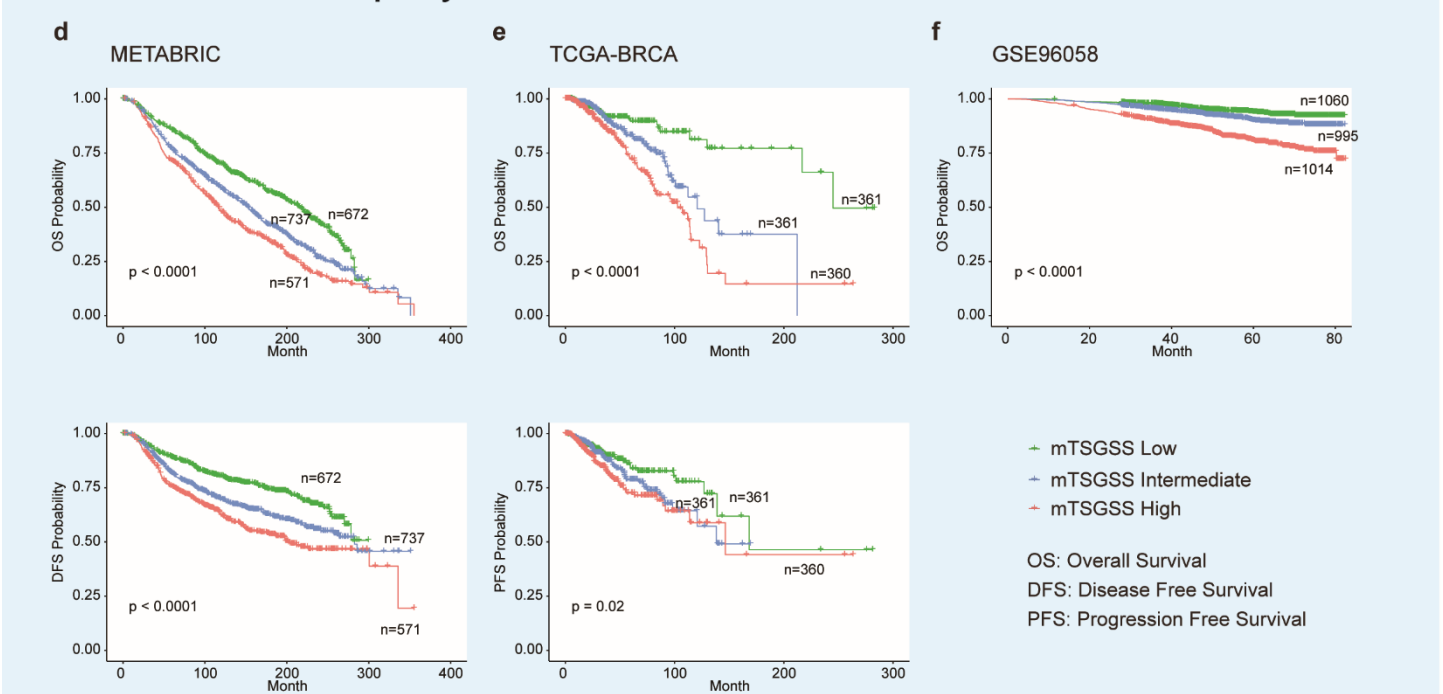

**Supplementary Figure S5. Prognostic value of individual PGR gene sets in human breast cancer. Tumor onset PGR gene set (a-c):** (a) Kaplan-Meier survival curves for disease-free (DFS) and overall (OS) survival are presented in the METABRIC dataset. (b) Kaplan-Meier survival curves for progression-free survival (PFS) and OS in TCGA-BRCA dataset. (c) Kaplan-Meier survival curves for OS in the GSE96058 dataset. **Tumor multiplicity gene set (d-f):** (d) Kaplan-Meier survival curves for DFS and OS are presented in the METABRIC dataset. (e) Kaplan-Meier survival curves for PFS and OS in TCGA-BRCA dataset. (f) Kaplan-Meier survival curves for overall OS in the GSE96058 dataset. The p values shown were obtained from the log-rank test.

## Gene set from tumor metastasis

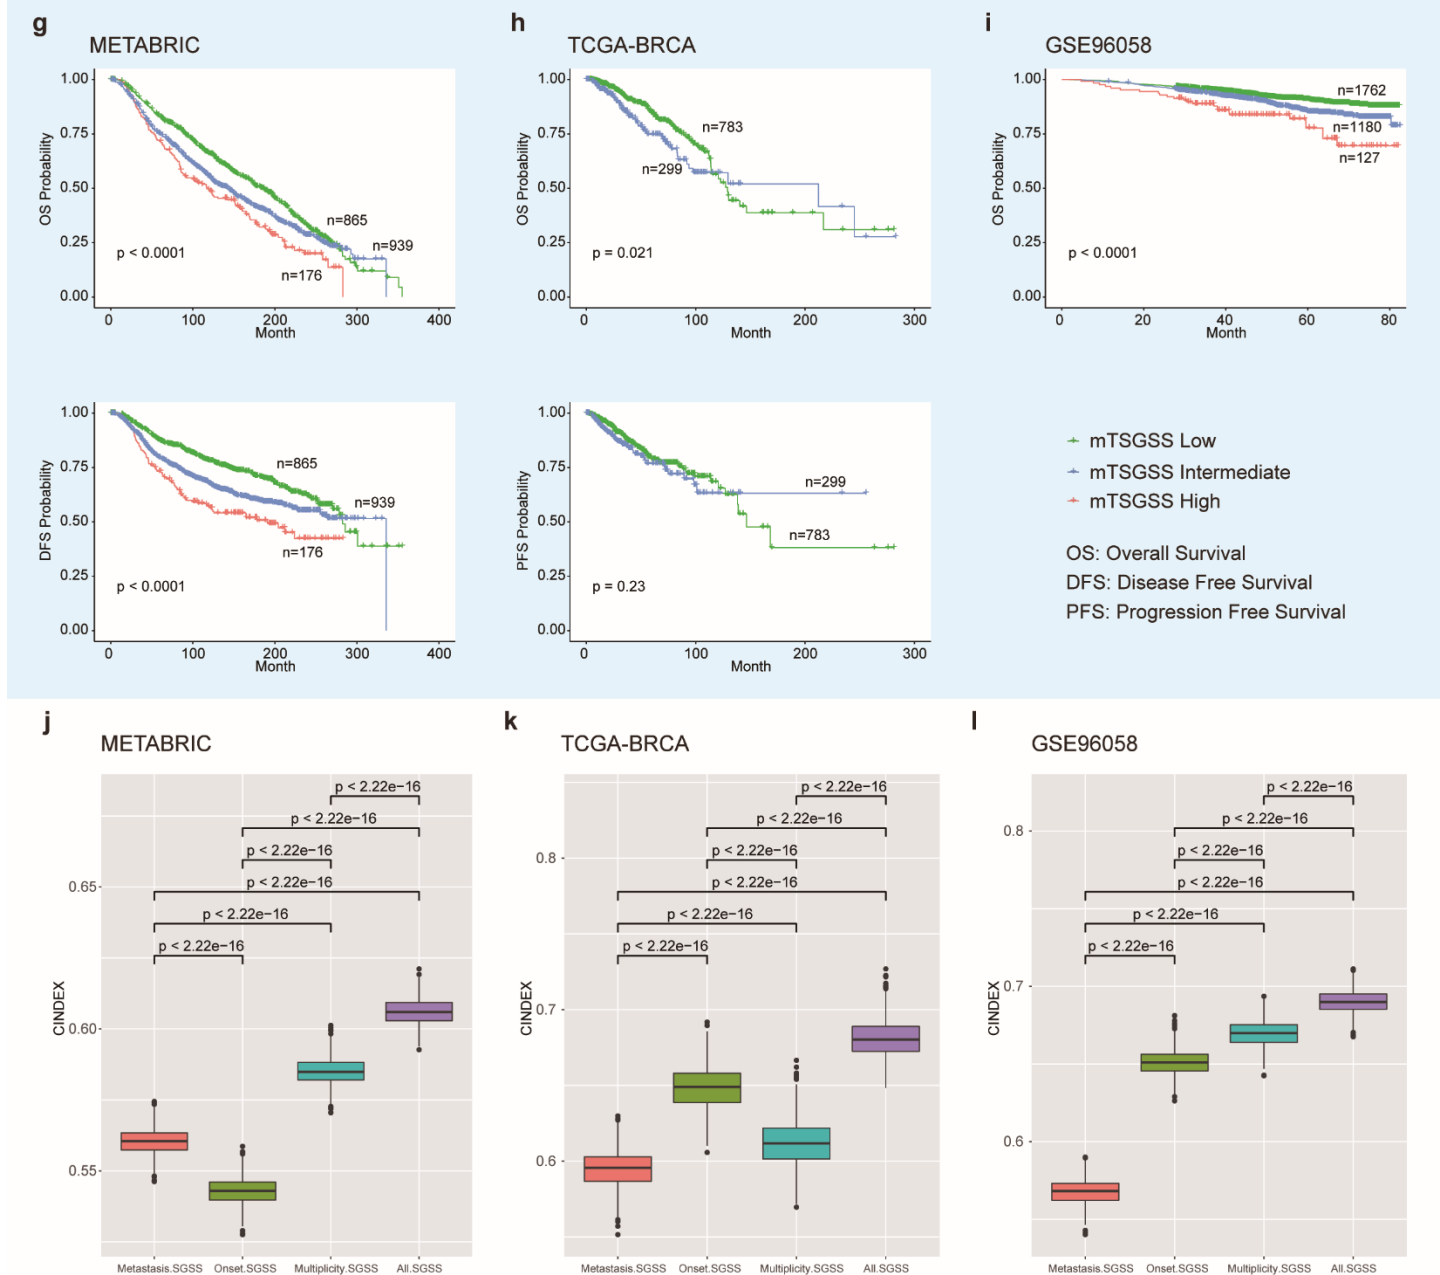

**Supplementary Figure S5. (continued) Tumor metastasis gene set (g-i):** (g) Kaplan-Meier survival curves for DFS and OS are presented in the METABRIC dataset. (h) Kaplan-Meier survival curves for PFS and OS in TCGA-BRCA dataset. (i) Kaplan-Meier survival curves for overall OS in the GSE96058 dataset. The p values shown were obtained from the log-rank test. (j-l) Comparing predictive power between different PGR gene sets and combinations of them by Cindex in METARBRIC (j), TCGA-BRCA (k), and GSE96058 (l) cohorts. The p values were obtained from the Mann-Whitney U test.

## Normal-like

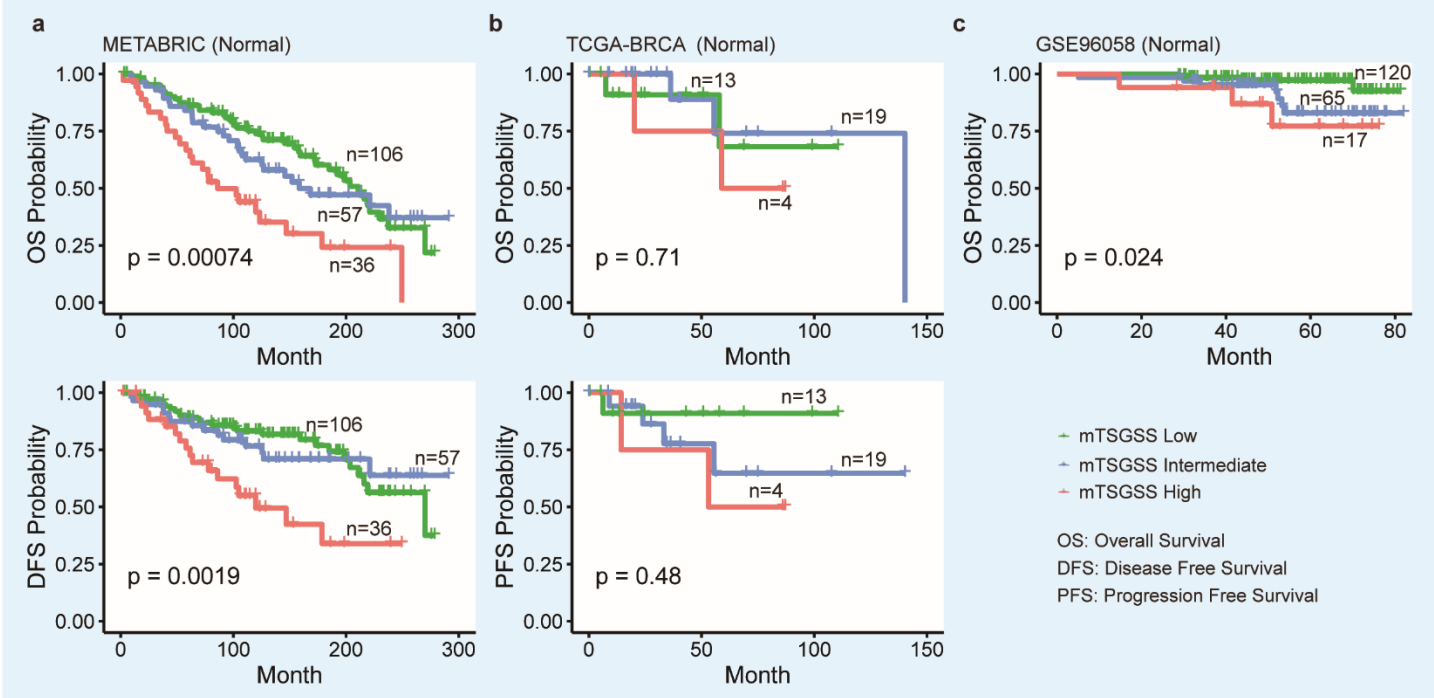

## Luminal A

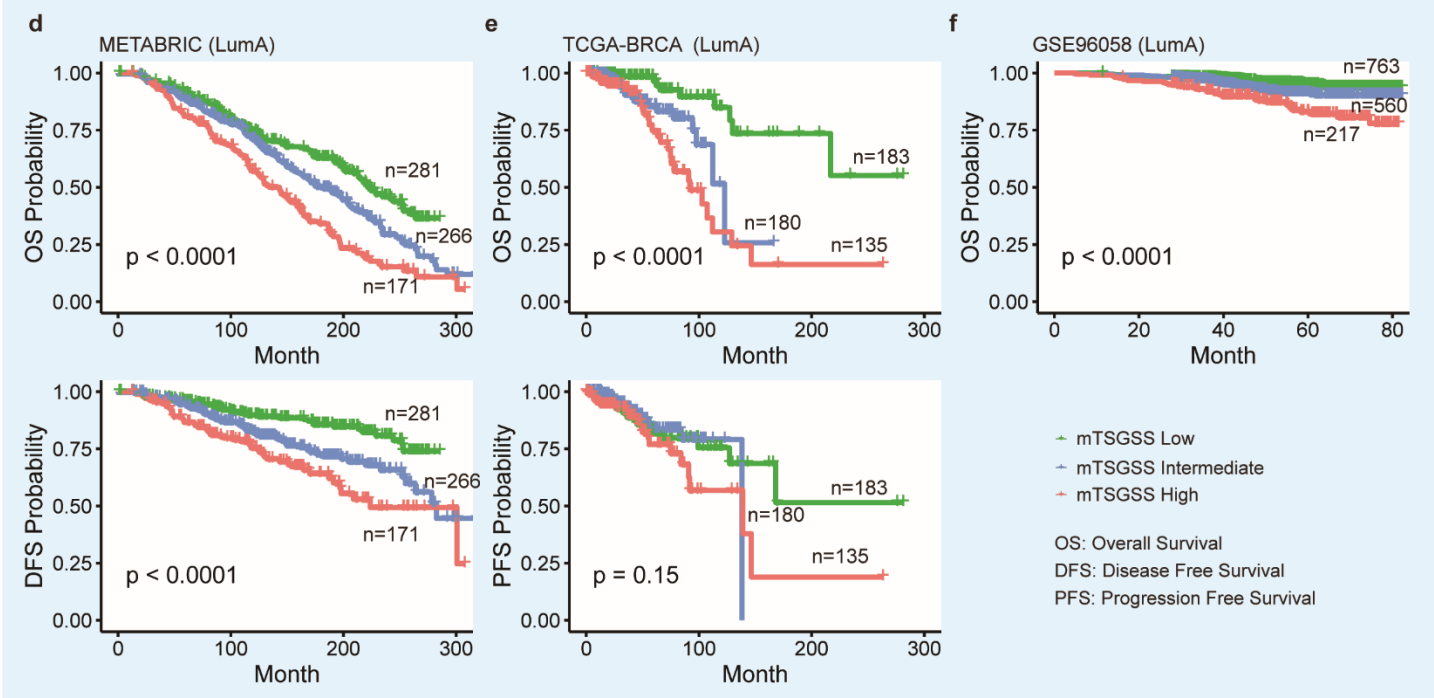

**Supplementary Figure S6. Association of hTSGSS with clinical outcomes in each PAM50 molecular subtype. Normal-like (a-c):** (a) Kaplan-Meier survival curves for disease-free (DFS) and overall (OS) survival are presented in the METABRIC dataset. (b) Kaplan-Meier survival curves for progression-free survival (PFS) and OS in TCGA-BRCA dataset. (c) Kaplan-Meier survival curves for OS in the GSE96058 dataset. **Luminal A (d-f):** (d) Kaplan-Meier survival curves for DFS and OS are presented in the METABRIC dataset. (e) Kaplan-Meier survival curves for PFS and OS in TCGA-BRCA dataset. (f) Kaplan-Meier survival curves for overall OS in the GSE96058 dataset. The p values shown were obtained from the log-rank test.



## Luminal B

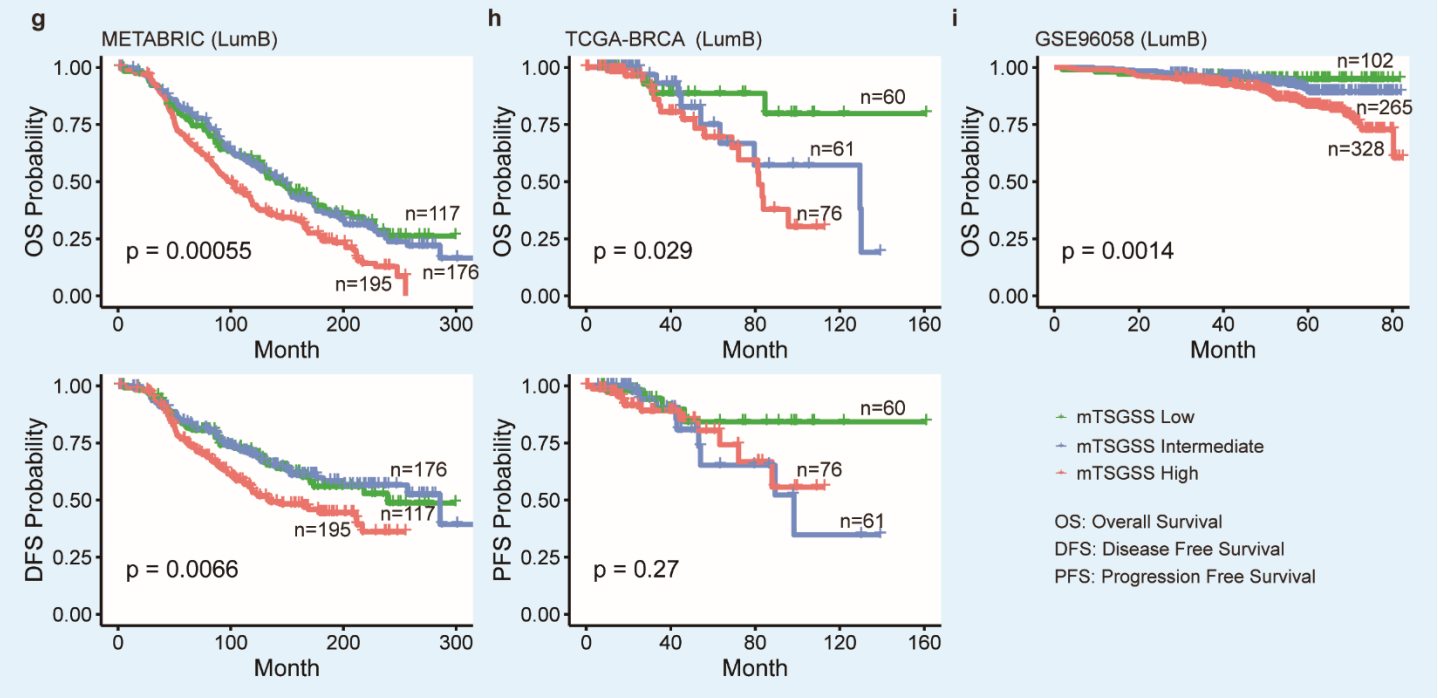

## ERBB2/HER2

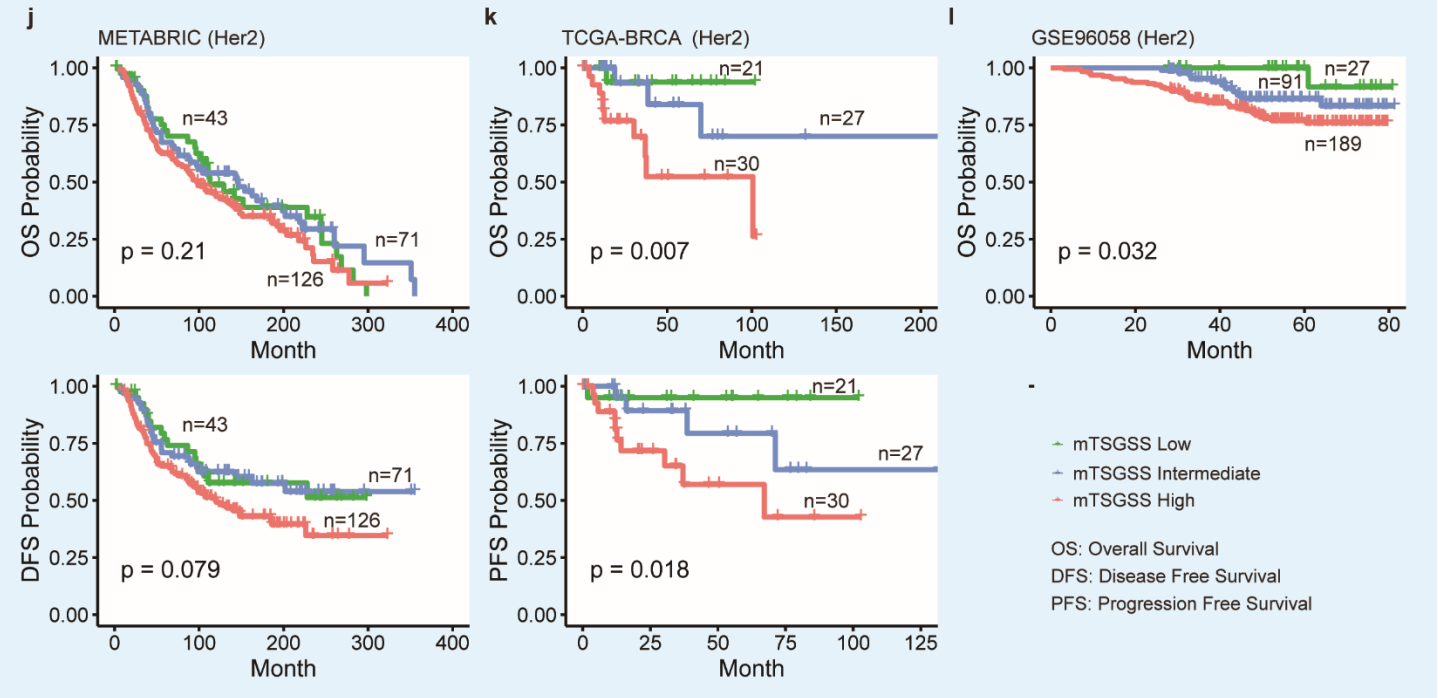

**Supplementary Figure S6. (continued). Luminal B (g-i):** (g) Kaplan-Meier survival curves for DFS and OS are presented in the METABRIC dataset. (h) Kaplan-Meier survival curves for PFS and OS in TCGA-BRCA dataset. (i) Kaplan-Meier survival curves for OS in the GSE96058 dataset. **ERBB2/HER2 (j-l):** (j) Kaplan-Meier survival curves for DFS and OS are presented in the METABRIC dataset. (k) Kaplan-Meier survival curves for PFS and OS in TCGA-BRCA dataset. (l) Kaplan-Meier survival curves for OS in the GSE96058 dataset. The p values shown were obtained from the log-rank test.

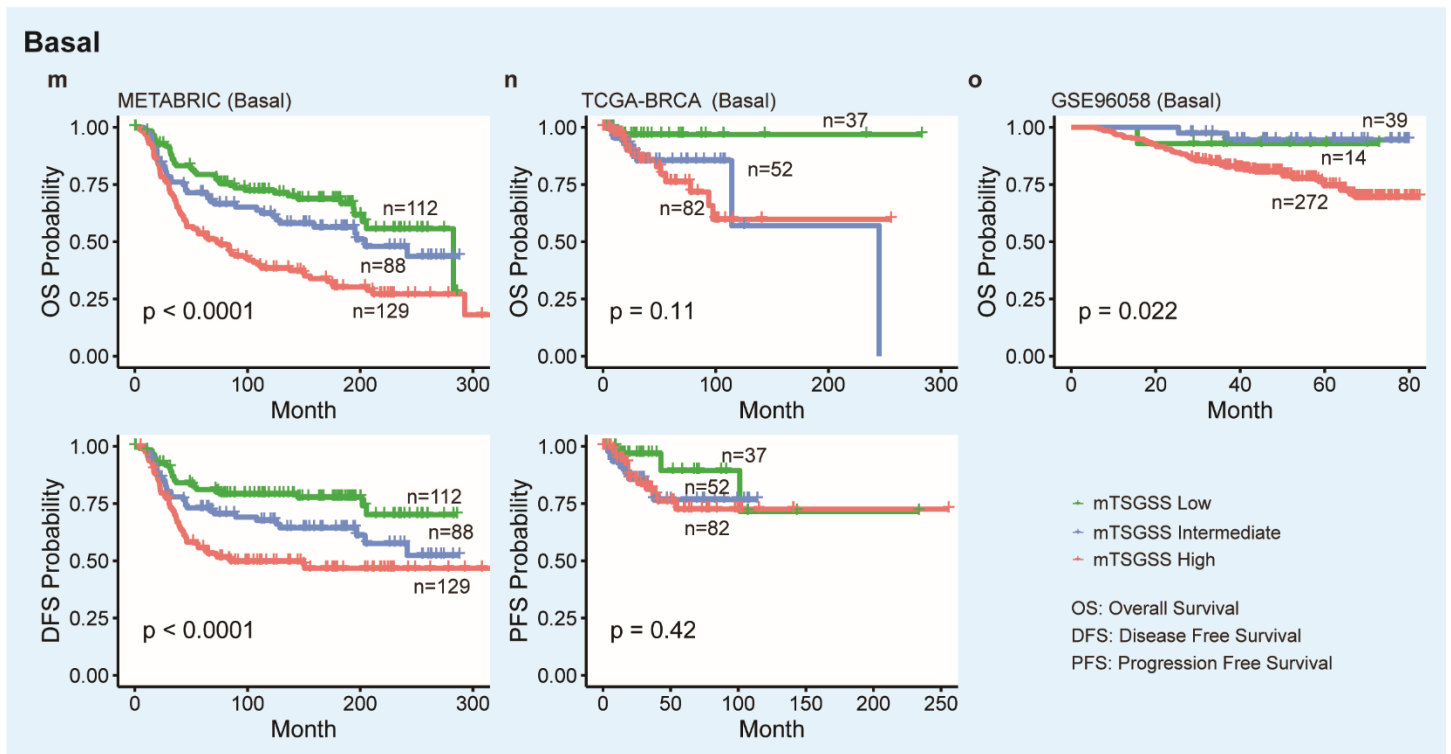

**Supplementary Figure S6. (continued). Basal (m-o):** (m) Kaplan-Meier survival curves for DFS and OS are presented in the METABRIC dataset. (n) Kaplan-Meier survival curves for PFS and OS in TCGA-BRCA dataset. (o) Kaplan-Meier survival curves for OS in the GSE96058 dataset. The p values shown were obtained from the log-rank test.

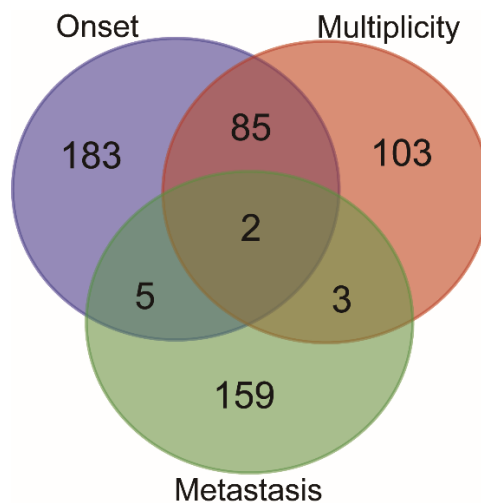

**Supplementary Figure S7.** Venn diagram of the number of candidate genes among different *ErbB2*-driven tumor phenotypes.



## Supplementary Tables

**Supplementary Table S1.** Summary of *ErbB2*-driven tumor phenotypes in each CC mouse strain and FVB/N mice.

| strain | Number of mice | Tumor onset   |                   |        | Multiplicity |       | Metastasis |       |       |        |
|--------|----------------|---------------|-------------------|--------|--------------|-------|------------|-------|-------|--------|
|        |                | median (days) | 95% CI for median |        | median       | range | overall    | lung  | liver | kidney |
|        |                |               | Lower             | Upper  |              |       |            |       |       |        |
| CC001  | 24             | 197.00        | 189.80            | 204.20 | 17           | 6~27  | 75.0%      | 70.8% | 4.2%  | 0.0%   |
| CC003  | 26             | 242.00        | 207.02            | 276.98 | 6            | 1~16  | 38.5%      | 38.5% | 0.0%  | 7.7%   |
| CC004  | 24             | 235.00        | 229.46            | 240.54 | 11           | 4~21  | 39.1%      | 39.1% | 0.0%  | 0.0%   |
| CC005  | 23             | 290.00        | 273.18            | 306.82 | 4            | 2~11  | 60.0%      | 60.0% | 0.0%  | 0.0%   |
| CC006  | 27             | 236.00        | 230.91            | 241.09 | 5            | 2~16  | 46.2%      | 46.2% | 3.8%  | 3.8%   |
| CC007  | 17             | 167.00        | 153.55            | 180.45 | 15           | 7~24  | 41.2%      | 41.2% | 0.0%  | 0.0%   |
| CC009  | 25             | 331.00        | 290.20            | 371.80 | 4            | 1~15  | 41.7%      | 37.5% | 4.2%  | 0.0%   |
| CC012  | 27             | 338.00        | 324.43            | 351.57 | 3            | 1~13  | 42.3%      | 42.3% | 3.8%  | 0.0%   |
| CC013  | 22             | 200.00        | 190.43            | 209.57 | 13           | 7~24  | 43.8%      | 43.8% | 6.3%  | 12.5%  |
| CC015  | 23             | 178.00        | 166.26            | 189.74 | 9            | 3~17  | 81.0%      | 81.0% | 0.0%  | 0.0%   |
| CC016  | 34             | 354.00        | 329.71            | 378.29 | 4            | 1~10  | 45.5%      | 42.4% | 3.0%  | 0.0%   |
| CC017  | 22             | 258.00        | 238.46            | 277.54 | 3            | 1~9   | 47.6%      | 47.6% | 0.0%  | 0.0%   |
| CC019  | 27             | 193.00        | 189.61            | 196.39 | 11           | 5~18  | 66.7%      | 66.7% | 7.4%  | 0.0%   |
| CC021  | 20             | 193.00        | 187.16            | 198.84 | 12           | 3~17  | 90.0%      | 90.0% | 0.0%  | 0.0%   |
| CC024  | 21             | 246.00        | 232.54            | 259.46 | 7            | 0~21  | 65.0%      | 60.0% | 15.0% | 0.0%   |
| CC025  | 22             | 257.00        | 228.27            | 285.73 | 3            | 2~9   | 68.2%      | 68.2% | 0.0%  | 4.5%   |
| CC026  | 24             | 255.00        | 216.59            | 293.41 | 6            | 0~14  | 45.8%      | 45.8% | 4.2%  | 4.2%   |
| CC030  | 29             | 179.00        | 168.45            | 189.55 | 9            | 4~18  | 37.9%      | 34.5% | 3.4%  | 0.0%   |
| CC032  | 26             | 287.00        | 278.01            | 295.99 | 5            | 2~13  | 73.1%      | 73.1% | 3.8%  | 0.0%   |
| CC033  | 26             | 213.00        | 185.52            | 240.48 | 7            | 3~17  | 34.6%      | 34.6% | 3.8%  | 0.0%   |
| CC036  | 40             | 193.00        | 178.83            | 207.17 | 6            | 2~17  | 40.0%      | 37.5% | 2.5%  | 0.0%   |
| CC037  | 24             | 214.00        | 204.40            | 223.60 | 7            | 2~21  | 54.2%      | 54.2% | 16.7% | 0.0%   |
| CC038  | 31             | 496.00        | 435.12            | 556.88 | 1            | 0~4   | 38.5%      | 38.5% | 0.0%  | 0.0%   |
| CC039  | 23             | 209.00        | 198.04            | 219.96 | 10           | 1~8   | 47.8%      | 47.8% | 0.0%  | 0.0%   |
| CC041  | 26             | 244.00        | 237.65            | 250.35 | 7            | 1~15  | 46.2%      | 46.2% | 0.0%  | 0.0%   |
| CC042  | 21             | 177.00        | 168.03            | 185.97 | 13           | 7~22  | 57.1%      | 57.1% | 0.0%  | 4.8%   |
| CC051  | 23             | 396.00        | 325.60            | 466.40 | 3            | 1~6   | 53.8%      | 53.8% | 0.0%  | 0.0%   |
| CC057  | 18             | 215.00        | 206.68            | 223.32 | 6            | 2~14  | 61.1%      | 61.1% | 0.0%  | 0.0%   |
| CC059  | 17             | 287.00        | 264.14            | 309.86 | 7            | 3~10  | 50.0%      | 50.0% | 0.0%  | 0.0%   |
| CC080  | 20             | 352.00        | 299.41            | 404.59 | 2            | 1~7   | 50.0%      | 50.0% | 0.0%  | 0.0%   |
| FVB/N  | 20             | 184.00        | 175.23            | 192.77 | 8            | 2~13  | 35.0%      | 35.0% | 0.0%  | 0.0%   |

**Supplementary Table S2.** List of SNPs and their location and corresponding gene, the p-values for each tumor phenotype at each SNP.

**Supplementary Table S3.** Candidate genes for each tumor phenotype.

**Supplementary Table S4.** Data for prognostic analysis in the METABRIC dataset.

**Supplementary Table S5.** Data for prognostic analysis in the TCGA-BRCA dataset.

**Supplementary Table S6.** Data for prognostic analysis in the GSE96058 dataset.

**Supplementary Table S7.** Data for drug response analysis in the I-SPY2 (GSE194040) dataset.

**Supplementary Table S8.** Human homologs of mouse candidate genes for each tumor phenotype.
